# Supplementary material for: Testing of the Survivin Suppressant YM155 in a Large Panel of Drug-Resistant Neuroblastoma Cell Lines
Source: MDPI journal article supplement (doi:10.3390/cancers12030577), 2020-03-02
Supplement: s1 [file s1]

**Table S6.** YM155 concentrations that reduce the viability of neuroblastoma cell lines by 50% (IC<sub>50</sub>, mean ± S.D., n = 3) in the absence or presence of zosuquidar (1.25µM) as indicated by MTT assay or CellTiterGlo after 120h of incubation.

| Cell line                               | YM155 IC <sub>50</sub> (nM) | + Zosuquidar <sup>1</sup> |
|-----------------------------------------|-----------------------------|---------------------------|
| IMR-5 (MTT)                             | 7.18 ± 1.04                 | 10.64 ± 2.80              |
| IMR-5 (CellTiterGlo)                    | 6.27 ± 1.56                 | 19.99 ± 5.97              |
| IMR-5'DOCE <sup>20</sup> (MTT)          | 21,549 ± 638                | 13.63 ± 5.54              |
| IMR-5'DOCE <sup>20</sup> (CellTiterGlo) | 32,946 ± 4360               | 14.82 ± 4.66              |
| IMR-32 (MTT)                            | 1.40 ± 0.35                 | 1.80 ± 0.23               |
| IMR-32 (CellTiterGlo)                   | 1.22 ± 0.21                 | 1.91 ± 1.16               |
| IMR-32'DOX <sup>20</sup> (MTT)          | 35.53 ± 2.23                | 0.94 ± 0.08               |
| IMR-32'DOX <sup>20</sup> (CellTiterGlo) | 29.20 ± 3.56                | 0.86 ± 0.06               |

<sup>1</sup> The effects of zosuquidar alone are provided in Table S5.
