# Supplementary material for: Testing of the Survivin Suppressant YM155 in a Large Panel of Drug-Resistant Neuroblastoma Cell Lines
Source: MDPI journal article supplement (doi:10.3390/cancers12030577), 2020-03-02
Supplement: s1 [file s1]

# Figure S1

**A**

SH-EP-MYCN (TET21N)

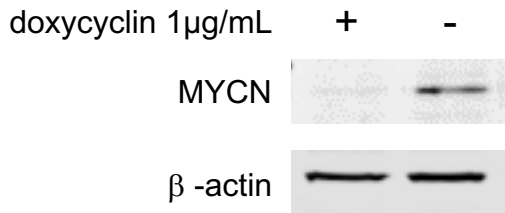

**B**

|                       | YM155 IC <sub>50</sub> (nM) |
|-----------------------|-----------------------------|
| - doxycyclin (1µg/mL) | 5.31 ± 3.21                 |
| + doxycyclin (1µg/mL) | 4.40 ± 1.69                 |

**Figure S1. Effects of MYCN expression on neuroblastoma cell sensitivity to YM155.** A) MYCN levels in SH-EP-MYCN (TET21N) cells in the absence or presence of doxycycline; B) YM155 concentrations that reduce the viability of SH-EP-MYCN (TET21N) cells by 50% (IC<sub>50</sub>, mean ± S.D., n = 3) in the absence or presence of doxycycline as determined by MTT assay after a 5-day treatment period.

# Figure S1

## Uncropped blots

MYCN

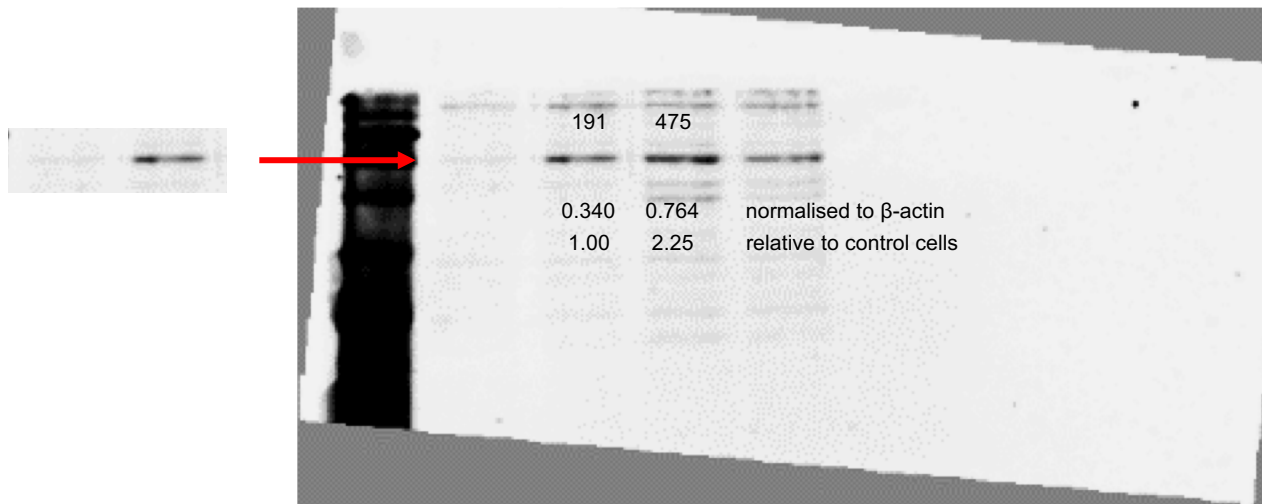

$\beta$ -actin

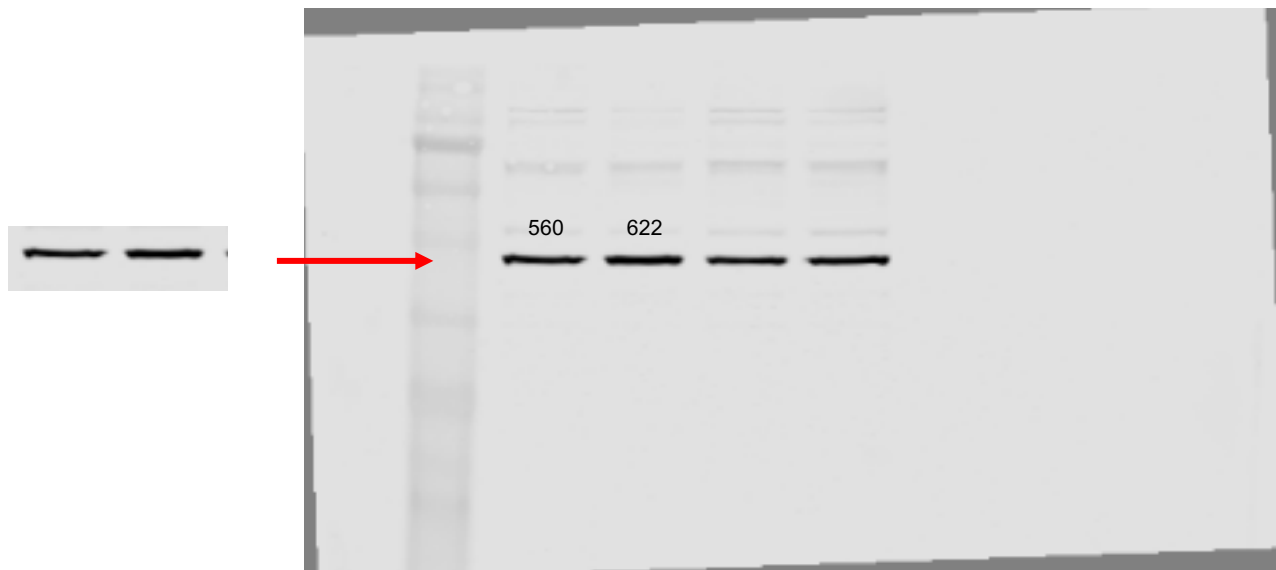

Densitometric analysis was performed with QuantiOne (BioRad). MYCN levels were normalised to  $\beta$ -actin expression and values relative to control cells are displayed.
