# Supplementary material for: Testing of the Survivin Suppressant YM155 in a Large Panel of Drug-Resistant Neuroblastoma Cell Lines
Source: MDPI journal article supplement (doi:10.3390/cancers12030577), 2020-03-02
Supplement: s1 [file s1]

**Table S2.** YM155 concentrations that reduce the viability of MYCN-amplified and non-MYCN-amplified neuroblastoma cell lines by 50% (IC<sub>50</sub>, mean ± S.D., n = 3) in the absence or presence of the ABCB1 inhibitors verapamil (5 µM) or zosuquidar (1.25 µM) as indicated by MTT assay after 120h of incubation.

| Cell line                              | YM155 IC <sub>50</sub> (nM) | + verapamil (5 µM) <sup>1</sup><br>YM155 IC <sub>50</sub> (nM) | + zosuquidar (1.25 µM)<br>YM155 IC <sub>50</sub> (nM) |
|----------------------------------------|-----------------------------|----------------------------------------------------------------|-------------------------------------------------------|
| <i>MYCN amplification</i> <sup>2</sup> |                             |                                                                |                                                       |
| CHP-134 (wt) <sup>3</sup>              | 2.64 ± 0.50                 | 1.64 ± 0.27                                                    | 1.85 ± 0.34                                           |
| IMR-5 (wt)                             | 7.18 ± 1.04                 | 9.70 ± 1.97                                                    | 10.64 ± 2.80                                          |
| IMR-32 (wt)                            | 1.40 ± 0.35                 | 1.70 ± 0.41                                                    | 1.80 ± 0.23                                           |
| NB-S-124 (wt)                          | 76.66 ± 6.51                | 12.52 ± 1.16                                                   | 3.20 ± 0.40                                           |
| NGP (wt)                               | 12.48 ± 3.01                | 17.35 ± 4.97                                                   | 24.95 ± 0.21                                          |
| NLF (V203M)                            | 26.78 ± 4.04                | 19.55 ± 1.20                                                   | 45.30 ± 1.34                                          |
| UKF-NB-2 (wt)                          | 4.18 ± 0.27                 | 4.55 ± 0.32                                                    | 2.85 ± 0.14                                           |
| UKF-NB-3 (wt)                          | 0.49 ± 0.10                 | 0.61 ± 0.13                                                    | 0.74 ± 0.10                                           |
| UKF-NB-6 (wt)                          | 0.65 ± 0.09                 | 0.58 ± 0.07                                                    | 0.57 ± 0.07                                           |
| <i>no MYCN amplification</i>           |                             |                                                                |                                                       |
| GIMEN (wt)                             | 33.74 ± 2.26                | 52.90 ± 8.62                                                   | 50.87 ± 5.91                                          |
| LAN-6 (wt)                             | 248.1 ± 32.9                | 46.75 ± 2.33                                                   | 24.35 ± 1.06                                          |
| SHEP (wt)                              | 10.15 ± 0.84                | 3.92 ± 0.11                                                    | 3.20 ± 0.14                                           |
| SK-N-AS (null)                         | 3.55 ± 0.21                 | 1.01 ± 0.26                                                    | 1.31 ± 0.11                                           |
| SK-N-SH (wt)                           | 74.94 ± 19.52               | 6.80 ± 0.83                                                    | 1.72 ± 0.15                                           |

<sup>1</sup> Effects of verapamil or zosuquidar alone on cell viability are presented in Table S5.

<sup>2</sup> References:

Thiele, C. Neuroblastoma. *In Human Cell Culture*, Masters, J., Ed., Kluwer Academic Publishers: Lancaster, UK, 1998; Volume 1, pp. 21-53.

Fischer, M.; Berthold, F. Characterization of the gene expression profile of neuroblastoma cell line IMR-5 using serial analysis of gene expression. *Cancer Lett.* **2003**, *190*, 79-87.

Kotchetkov, R.; Cinatl, J.; Blaheta, R.; Vogel, J.U.; Karaskova, J.; Squire, J.; Hernáiz Driever, P.; Klingebiel, T.; Cinatl, J. Jr. Development of resistance to vincristine and doxorubicin in neuroblastoma alters malignant properties and induces additional karyotype changes: a preclinical model. *Int. J. Cancer* **2003**, *104*, 36-43.

Edsjö, A.; Nilsson, H.; Vandesompele, J.; Karlsson, J.; Pattyn, F.; Culp, L.A.; Speleman, F.; Pålman, S. Neuroblastoma cells with overexpressed MYCN retain their capacity to undergo neuronal differentiation. *Lab. Invest.* **2004**, *84*, 406-417.

Kotchetkov, R.; Driever, P.H.; Cinatl, J.; Michaelis, M.; Karaskova, J.; Blaheta, R.; Squire, J.A.; Von Deimling, A.; Moog, J.; Cinatl, J. Jr. Increased malignant behavior in neuroblastoma cells with acquired multi-drug resistance does not depend on P-gp expression. *Int. J. Oncol.* **2005**, *27*, 1029-1037.

Carr, J.; Bown, N.P.; Case, M.C.; Hall, A.G.; Lunec, J.; Tweddle, D.A. High-resolution analysis of allelic imbalance in neuroblastoma cell lines by single nucleotide polymorphism arrays. *Cancer Genet. Cytogenet.* **2007**, *172*, 127-138.

Michaelis, M.; Kleinschmidt, M.C.; Barth, S.; Rothweiler, F.; Geiler, J.; Breitling, R.; Mayer, B.; Deubzer, H.; Witt, O.; Kreuter, J.; Doerr, H.W.; Cinatl, J.; Cinatl, J. Jr. Anti-cancer effects of artesunate in a panel of chemoresistant neuroblastoma cell lines. *Biochem. Pharmacol.* **2010**, *79*, 130-136.

Dassi, E.; Greco, V.; Sidarovich, V.; Zuccotti, P.; Arseni, N.; Scaruffi, P.; Tonini, G.P.; Quattrone, A. Multi-omic profiling of MYCN-amplified neuroblastoma cell-lines. *Genom. Data* **2015**, *6*, 285-287.

Michaelis, M.; Agha, B.; Rothweiler, F.; Löschmann, N.; Voges, Y.; Mittelbronn, M.; Starzetz, T.; Harter, P.N.; Abhari, B.A.; Fulda, S.; Westermann, F.; Riecken, K.; Spek, S.; Langer, K.; Wiese, M.; Dirks, W.G.; Zehner, R.; Cinatl, J.; Wass, M.N.; Cinatl, J. Jr. Identification of flubendazole as potential anti-neuroblastoma compound in a large cell line screen. *Sci. Rep.* **2015**, *5*, 8202.

<sup>3</sup> TP53 status: wt, wild-type; otherwise type of mutation is provided
