# Supplementary material for: Testing of the Survivin Suppressant YM155 in a Large Panel of Drug-Resistant Neuroblastoma Cell Lines
Source: MDPI journal article supplement (doi:10.3390/cancers12030577), 2020-03-02
Supplement: s1 [file s1]

## Figure S2

**A**

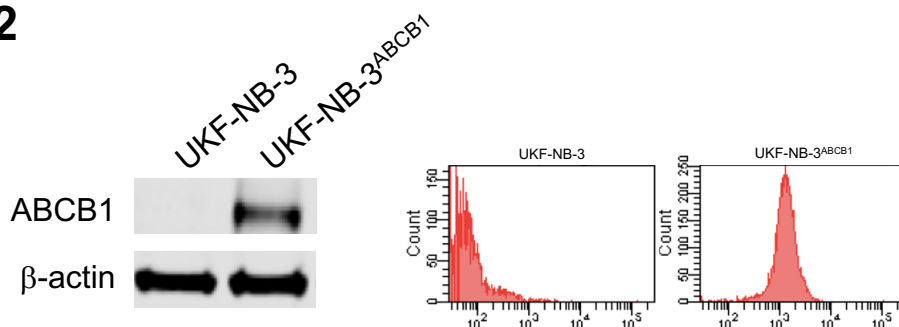

**B**

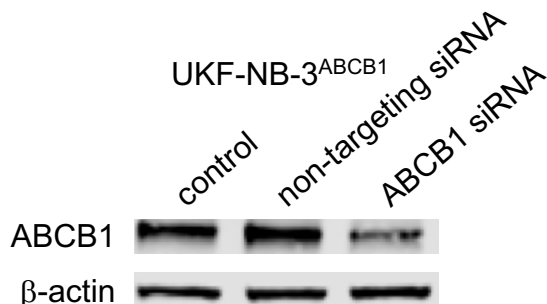

**C**

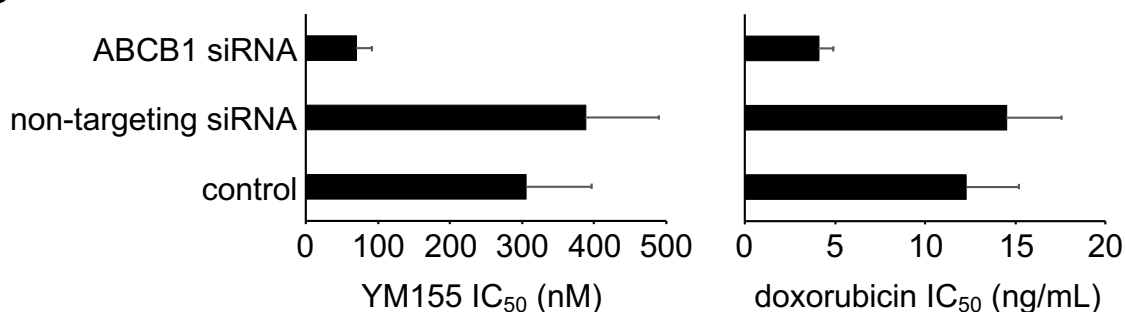

**D**

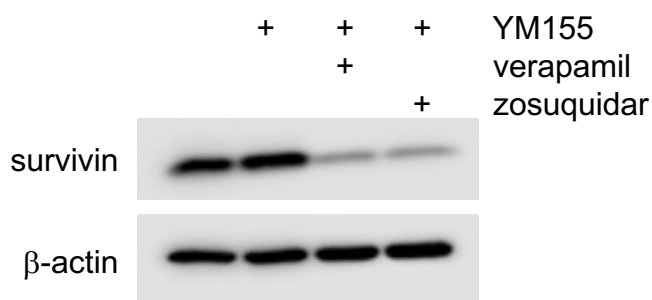

**Figure S2. Effects of YM155 in ABCB1-transduced cells.** A) Representative Western blots and flow cytometry histograms indicating ABCB1 levels in UKF-NB-3 cells and in UKF-NB-3 transduced with a lentiviral vector encoding ABCB1 (UKF-NB-3<sup>ABCB1</sup>). B) Effect of siRNA directed against ABCB1 on cellular ABCB1 levels in UKF-NB-3<sup>ABCB1</sup> cells. C) Concentrations of YM155 and doxorubicin (alternative ABCB1 substrate used as control) that reduce the viability of UKF-NB-3<sup>ABCB1</sup> cells by 50% (IC<sub>50</sub>, mean  $\pm$  S.D., n = 3) as determined by MTT assay after 120h of incubation. D) Effects of YM155 (100nM) on survivin levels in UKF-NB-3<sup>ABCB1</sup> cells after 24h of incubation in the presence or absence of verapamil (5 $\mu$ M) or zosuquidar (1.25 $\mu$ M).

# Figure S2

## Uncropped blots S2A

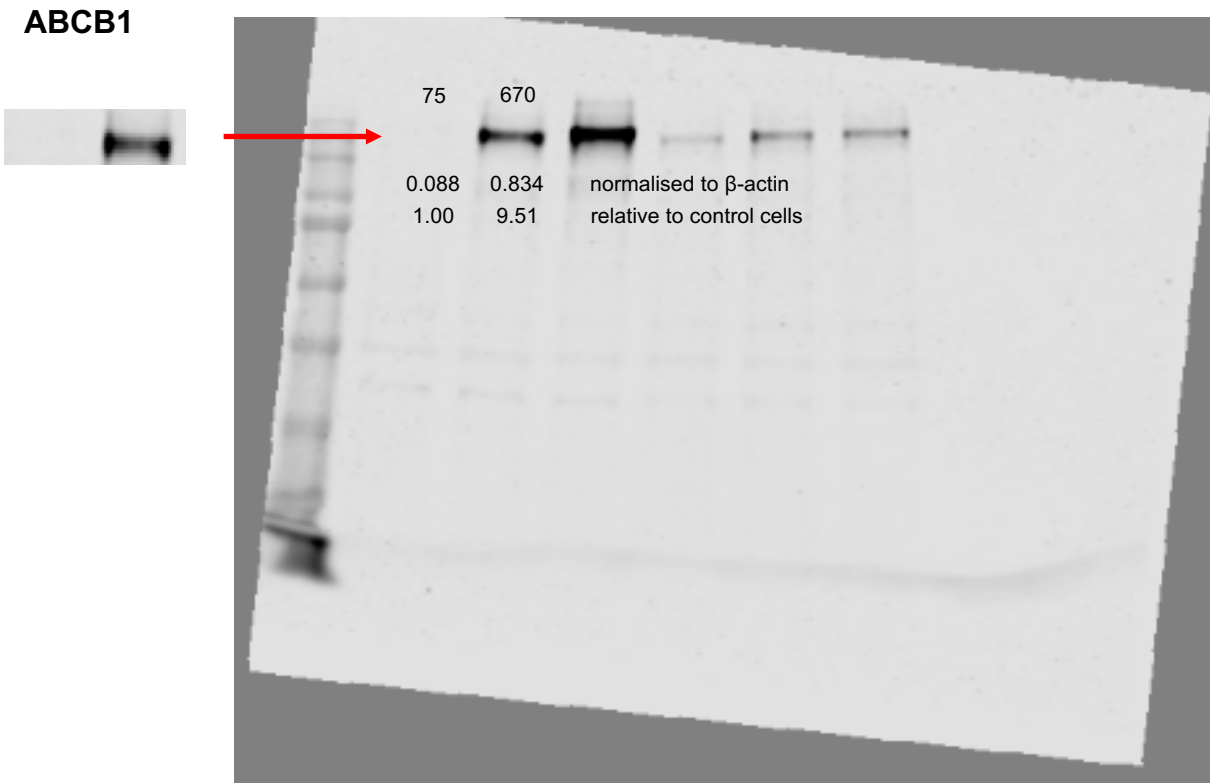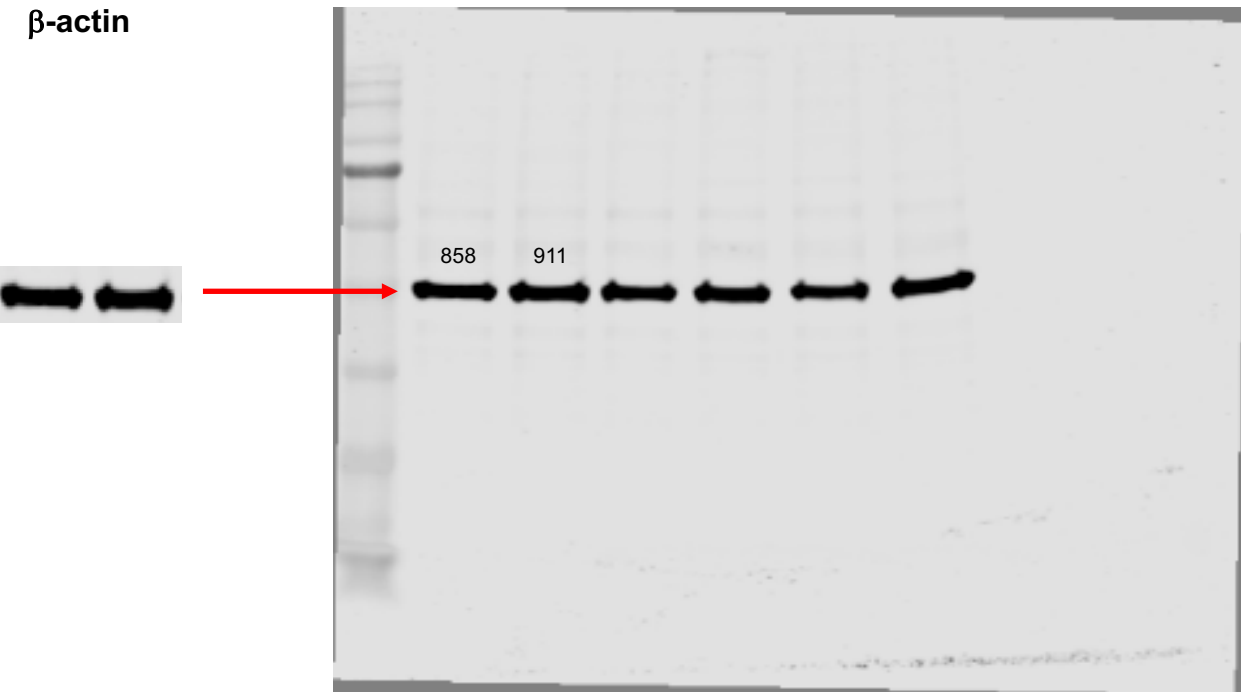

Densitometric analysis was performed with QuantiOne (BioRad). ABCB1 levels were normalised to  $\beta$ -actin expression and values relative to control cells are displayed.

## Figure S2

### Uncropped blots S2B

ABCB1

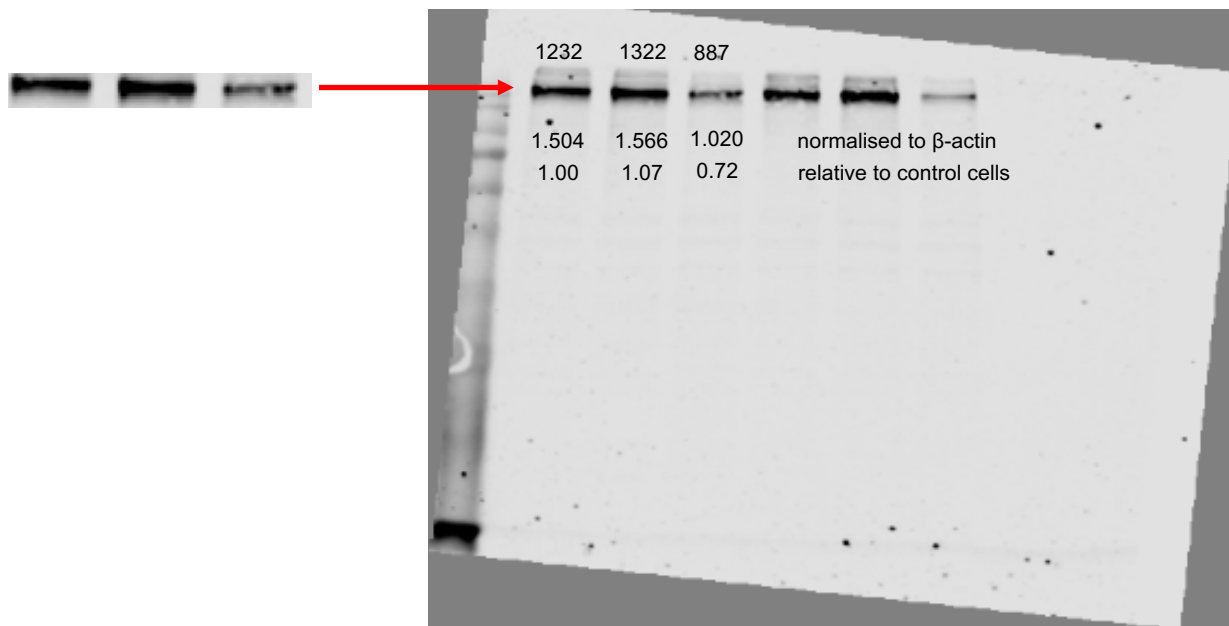

$\beta$ -actin

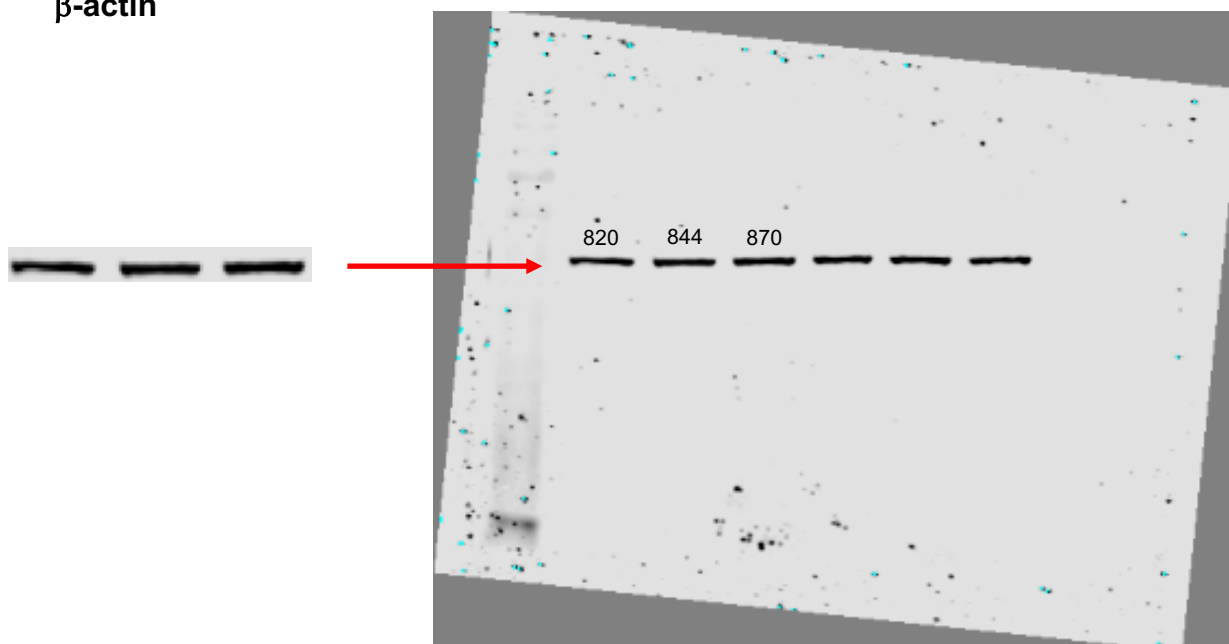

Densitometric analysis was performed with QuantiOne (BioRad). ABCB1 levels were normalised to  $\beta$ -actin expression and values relative to control cells are displayed.

# Figure S2

## Uncropped blots S2D

survivin

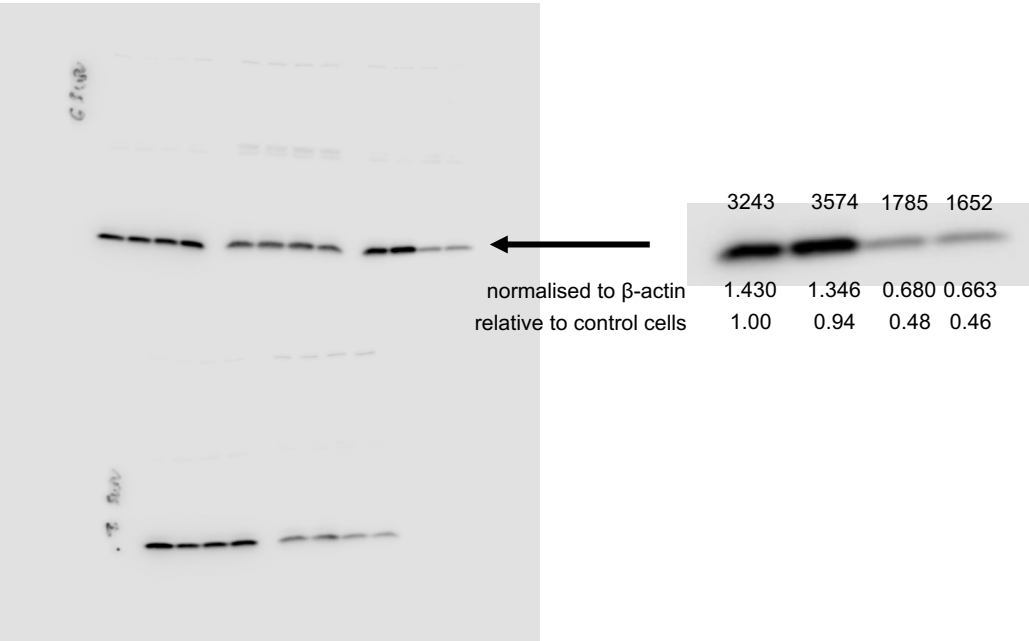

$\beta$ -actin

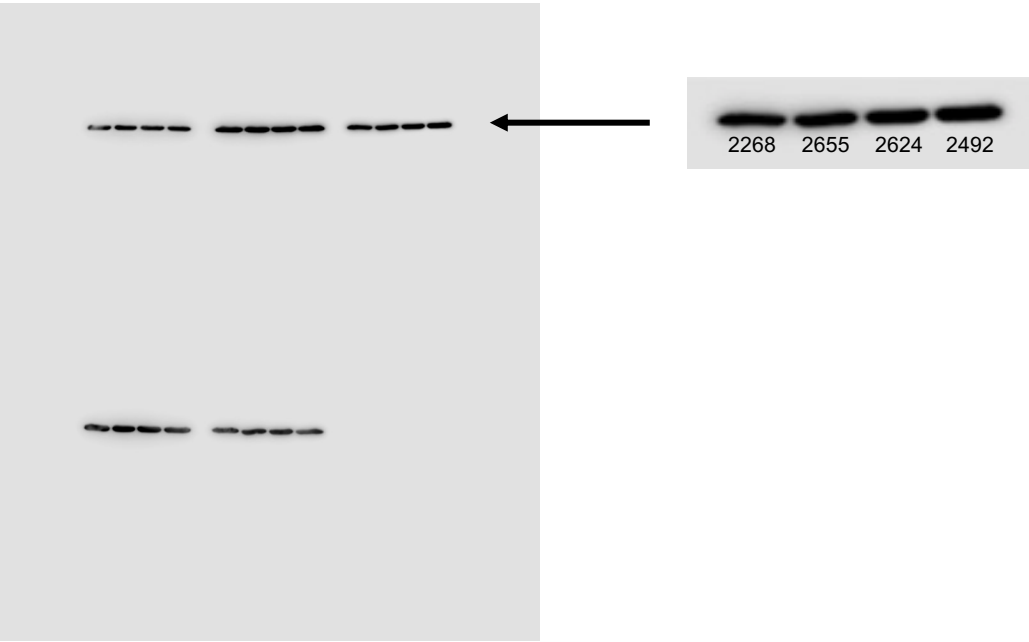

Densitometric analysis was performed with QuantiOne (BioRad). Survivin levels were normalised to  $\beta$ -actin expression and values relative to control cells are displayed.
