# Supplementary material for: Testing of the Survivin Suppressant YM155 in a Large Panel of Drug-Resistant Neuroblastoma Cell Lines
Source: MDPI journal article supplement (doi:10.3390/cancers12030577), 2020-03-02
Supplement: s1 [file s1]

**Table S4.** Mean YM155 concentrations that reduce the viability of neuroblastoma cell lines with resistance to certain drug classes by 50% (IC<sub>50</sub>, mean ± S.D., n = 3) as indicated by MTT assay after 120h of incubation. Values are presented as mean ± S.D. Individual values are presented in Table S1.

| <b>Drug class</b>                                 | <b>YM155 IC<sub>50</sub> (nM)</b> |
|---------------------------------------------------|-----------------------------------|
| topoisomerase I inhibitors                        | 4.63 ± 2.52                       |
| parental                                          | 7.91 ± 8.27                       |
| nucleoside analogue (gemcitabine)                 | 9.18 ± 14.62                      |
| alkylating agents                                 | 18.29 ± 5.63                      |
| platinum drugs                                    | 58.43 ± 98.80                     |
| topoisomerase II inhibitors                       | 73.67 ± 112.42                    |
| including UKF-NB-3 <sup>r</sup> DOX <sup>20</sup> | 1190 ± 4026                       |
| taxane (docetaxel)                                | 354 ± 411                         |
| including IMR-5 <sup>r</sup> DOCE <sup>20</sup>   | 3889 ± 7908                       |
| vinca alkaloids                                   | 1725 ± 2519                       |
