# Supplementary material for: Testing of the Survivin Suppressant YM155 in a Large Panel of Drug-Resistant Neuroblastoma Cell Lines
Source: MDPI journal article supplement (doi:10.3390/cancers12030577), 2020-03-02
Supplement: s1 [file s1]

## Figure S3

**A**

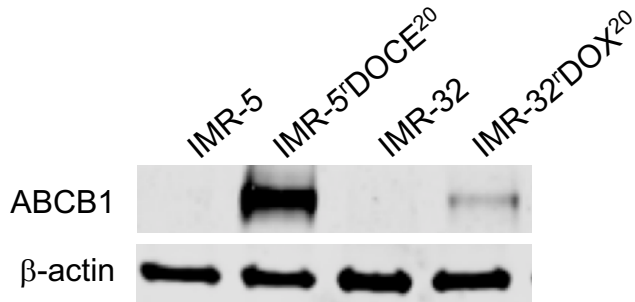

**B**

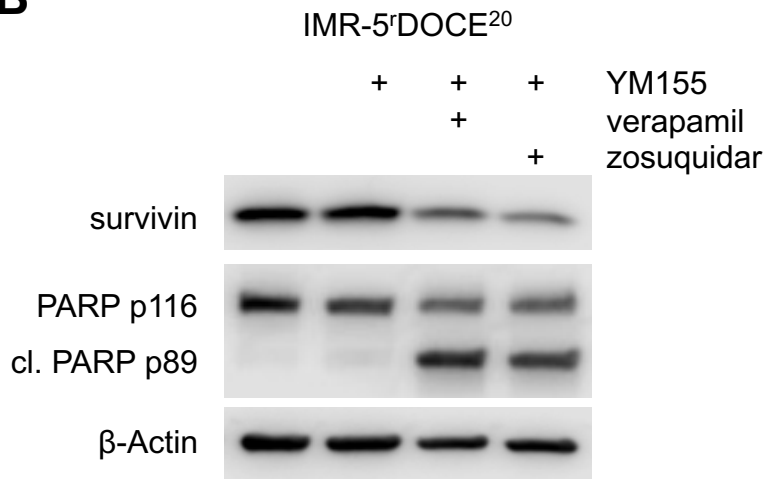

**Figure S3. ABCB1 expression and YM155 activity in drug-adapted neuroblastoma cells.** A) Representative Western blots indicating ABCB1 levels in IMR-5, IMR-5<sup>rDOCE</sup><sup>20</sup>, IMR-32, and IMR-32<sup>rDOX</sup><sup>20</sup>. B) Effects of YM155 (500nM) on survivin levels and PARP cleavage in IMR-5<sup>rDOCE</sup><sup>20</sup> cells in the presence or absence of verapamil (5μM) or zosuquidar (1.25μM) after 24h of incubation.

**Figure S3**  
**Uncropped blots**

**A**

**ABCB1**

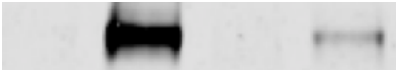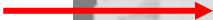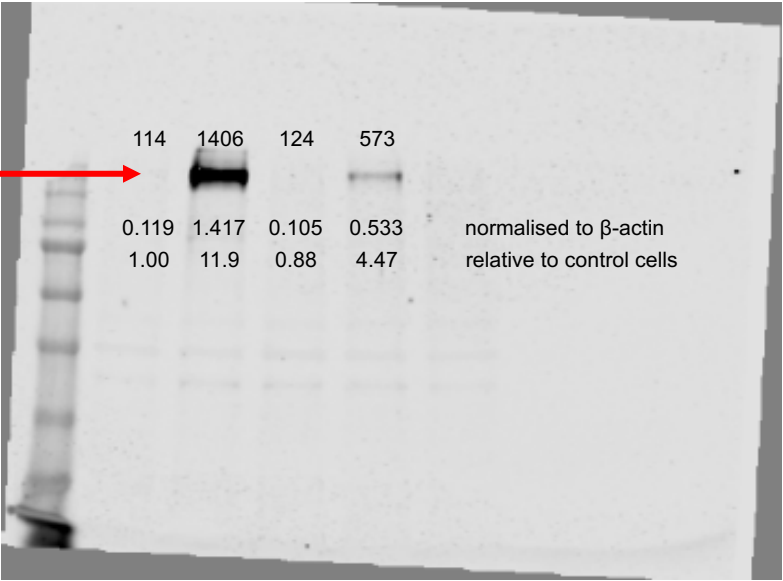

**$\beta$ -actin**

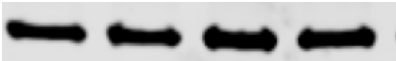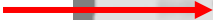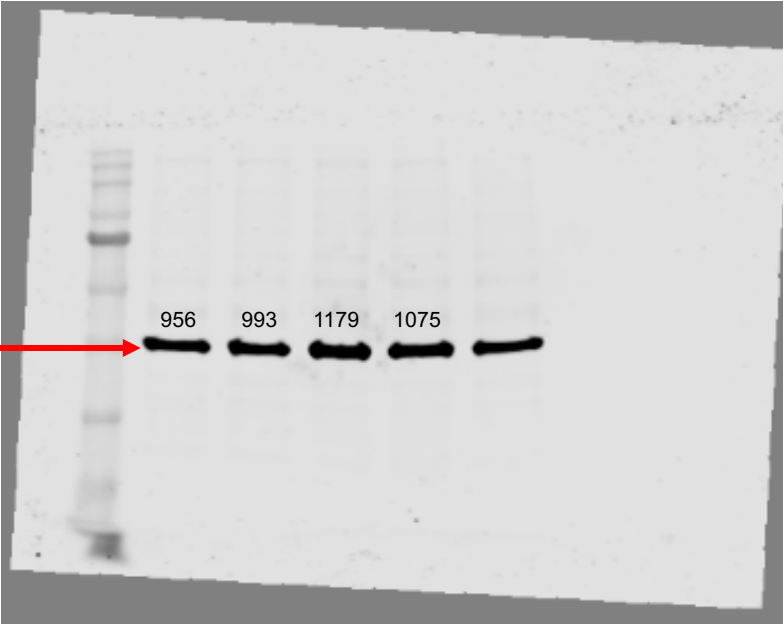

Densitometric analysis was performed with QuantiOne (BioRad). ABCB1 levels were normalised to  $\beta$ -actin expression and values relative to control cells are displayed.

# Figure S3

## Uncropped blots

### B

survivin

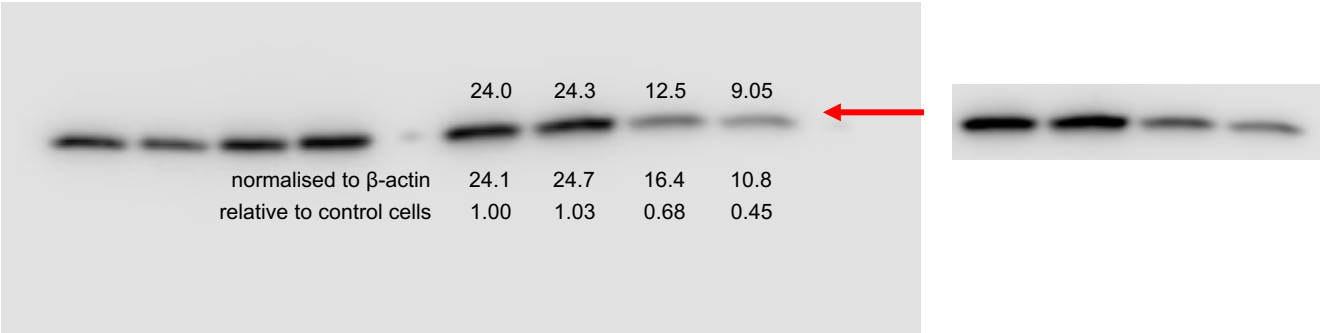

PARP

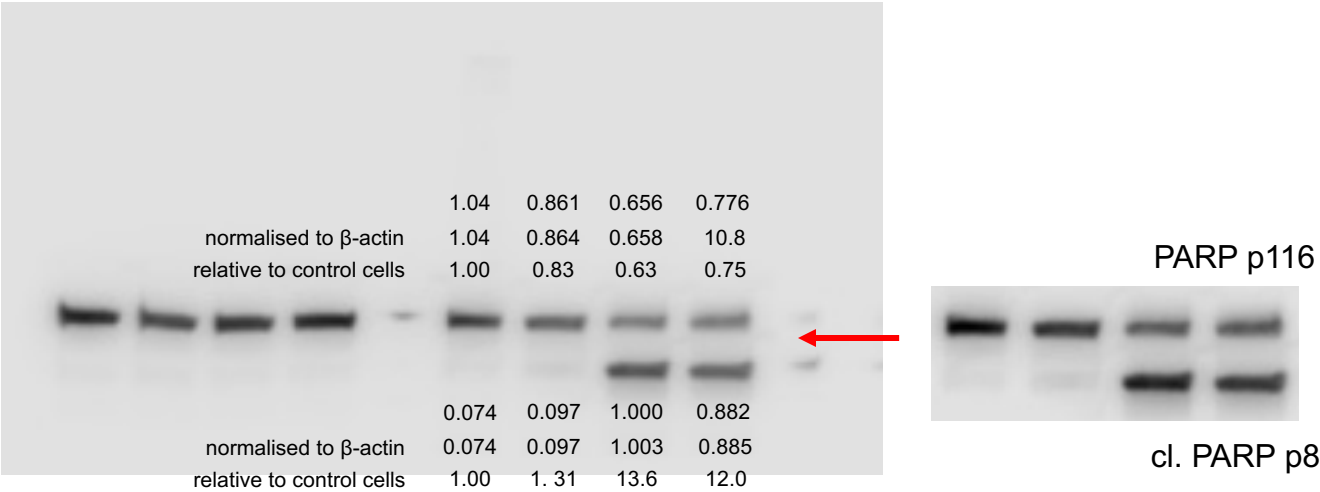

$\beta$ -actin

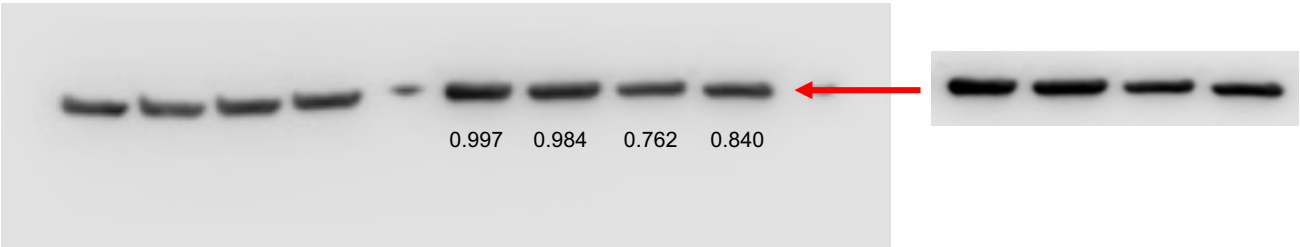

Densitometric analysis was performed with Image Studio Ver. 5.2 software (LICOR). Survivin and PARP levels were normalised to  $\beta$ -actin expression and values relative to control cells are displayed.
