# Supplementary material for: Testing of the Survivin Suppressant YM155 in a Large Panel of Drug-Resistant Neuroblastoma Cell Lines
Source: MDPI journal article supplement (doi:10.3390/cancers12030577), 2020-03-02
Supplement: s1 [file s1]

**Table S3.** YM155 concentrations that reduce the viability of neuroblastoma cell lines with varying p53 status by 50% (IC<sub>50</sub>, mean ± S.D., n = 3) as indicated by MTT assay after 120h of incubation.

| Cell line                                               | p53 status                | YM155 IC <sub>50</sub> (nM)    |
|---------------------------------------------------------|---------------------------|--------------------------------|
| UKF-NB-3                                                | wild-type                 | 0.49 ± 0.10                    |
| UKF-NB-3 <sup>r</sup> Nutlin <sup>10μM</sup>            | G245C (homo) <sup>1</sup> | 1.18 ± 0.07 (2.4) <sup>2</sup> |
| UKF-NB-3clone1                                          | wild-type                 | 0.35 ± 0.07                    |
| UKF-NB-3clone1 <sup>r</sup> Nutlin <sup>10μM</sup> I    | stop codon in exon 4      | 0.40 ± 0.12 (1.1)              |
| UKF-NB-3clone1 <sup>r</sup> Nutlin <sup>10μM</sup> III  | R248W (het)               | 0.60 ± 0.08 (1.7)              |
| UKF-NB-3clone1 <sup>r</sup> Nutlin <sup>10μM</sup> IV   | V173L (het)               | 0.45 ± 0.06 (1.3)              |
| UKF-NB-3clone1 <sup>r</sup> Nutlin <sup>10μM</sup> VI   | R196Q (het)               | 0.55 ± 0.17 (1.6)              |
| UKF-NB-3clone1 <sup>r</sup> Nutlin <sup>10μM</sup> VIII | Y236C (het)               | 0.50 ± 0.14 (1.4)              |
| UKF-NB-3clone1 <sup>r</sup> Nutlin <sup>10μM</sup> X    | P151R (het)               | 0.73 ± 0.08 (2.1)              |
| UKF-NB-3clone3                                          | wild-type                 | 0.45 ± 0.06                    |
| UKF-NB-3clone3 <sup>r</sup> Nutlin <sup>10μM</sup> I    | P152L (het)               | 1.50 ± 0.06 (3.3)              |
| UKF-NB-3clone3 <sup>r</sup> Nutlin <sup>10μM</sup> VIII | N239S (het)               | 0.50 ± 0.08 (1.1)              |
| UKF-NB-3clone3 <sup>r</sup> Nutlin <sup>10μM</sup> IX   | R280S (het)               | 1.03 ± 0.03 (2.3)              |
| UKF-NB-3clone3 <sup>r</sup> Nutlin <sup>10μM</sup> X    | I251F (het)               | 0.58 ± 0.09 (1.3)              |
| UKF-NB-6                                                | wild-type                 | 0.65 ± 0.09                    |
| UKF-NB-6 <sup>r</sup> Nutlin <sup>10μM</sup>            | K132N (het); P223L (hom)  | 0.64 ± 0.04 (1.0)              |
| UKF-NB-6 <sup>r</sup> Nutlin <sup>10μM</sup> I          | S241F (hom)               | 0.57 ± 0.01 (0.9)              |
| UKF-NB-6 <sup>r</sup> Nutlin <sup>10μM</sup> IV         | C135F (het); D281Y (het)  | 0.43 ± 0.04 (0.7)              |

<sup>1</sup> homo = homozygous, het = heterozygous

<sup>2</sup> fold change YM155 IC<sub>50</sub> nutlin-3-resistant sub-line/ YM155 IC<sub>50</sub> respective parental cell line
