# Supplementary material for: Testing of the Survivin Suppressant YM155 in a Large Panel of Drug-Resistant Neuroblastoma Cell Lines
Source: MDPI journal article supplement (doi:10.3390/cancers12030577), 2020-03-02
Supplement: s1 [file s1]

**Table S7.** YM155 concentrations that reduce the viability of neuroblastoma cell lines by 50% (IC<sub>50</sub>, mean ± S.D., n = 3) in the absence or presence of the ABCC1 inhibitor MK571 (10μM) as indicated by MTT assay after 120h of incubation.

| Cell line                          | YM155 IC <sub>50</sub> (nM) | + MK571                  |                             |
|------------------------------------|-----------------------------|--------------------------|-----------------------------|
|                                    |                             | MK571 alone <sup>1</sup> | YM155 IC <sub>50</sub> (nM) |
| NLF                                | 26.3 ± 5.9                  | 98 ± 15                  | 25.6 ± 9.1                  |
| NLF <sup>r</sup> VCR <sup>10</sup> | 324 ± 79                    | 102 ± 17                 | 141 ± 38                    |

<sup>1</sup> Effect of MK571 (10μM) on cell viability in percentage relative to untreated control.
