# Supplementary material for: Testing of the Survivin Suppressant YM155 in a Large Panel of Drug-Resistant Neuroblastoma Cell Lines
Source: MDPI journal article supplement (doi:10.3390/cancers12030577), 2020-03-02
Supplement: s1 [file s1]

**Table S1.** YM155 concentrations that reduce the viability of neuroblastoma cell lines by 50% (IC<sub>50</sub>, mean ± S.D., n = 3) as indicated by MTT assay after 120h of incubation.

| Cell line                                    | YM155 IC <sub>50</sub> (nM)    | Cell line                                    | YM155 IC <sub>50</sub> (nM) |
|----------------------------------------------|--------------------------------|----------------------------------------------|-----------------------------|
| Be(2)-C                                      | 24.25 ± 2.59                   | NLF <sup>r</sup> GEMCI <sup>20</sup>         | 1.84 ± 0.47 (0.1)           |
| CHP-134                                      | 2.64 ± 0.50                    | NLF <sup>r</sup> IRINO <sup>1000</sup>       | 6.93 ± 0.71 (0.3)           |
| GIMEN                                        | 33.74 ± 2.26                   | NLF <sup>r</sup> MEL <sup>3000</sup>         | 15.36 ± 3.20 (0.6)          |
| IMR-5                                        | 7.18 ± 1.04                    | NLF <sup>r</sup> OXALI <sup>4000</sup>       | 33.67 ± 2.67 (1.3)          |
| IMR-5 <sup>r</sup> CARBO <sup>5000</sup> (1) | 8.55 ± 2.01 (1.2) <sup>2</sup> | NLF <sup>r</sup> VCR <sup>10</sup>           | 334.5 ± 21.6 (12.5)         |
| IMR-5 <sup>r</sup> CDDP <sup>1000</sup>      | 19.71 ± 5.70 (2.7)             | NLF <sup>r</sup> VINB <sup>10</sup>          | 38.10 ± 12.02 (1.4)         |
| IMR-5 <sup>r</sup> DOCE <sup>20</sup>        | 21549 ± 638 (3001)             | NMB                                          | 6.41 ± 1.17                 |
| IMR-5 <sup>r</sup> DOX <sup>20</sup>         | 116.3 ± 21.6 (16.2)            | SHEP                                         | 10.15 ± 0.84                |
| IMR-5 <sup>r</sup> ETO <sup>100</sup>        | 8.29 ± 3.95 (1.2)              | SHEP <sup>r</sup> CDDP <sup>1000</sup>       | 30.83 ± 2.24 (13.7)         |
| IMR-5 <sup>r</sup> GEMCI <sup>20</sup>       | 7.08 ± 1.20 (1.0)              | SHEP <sup>r</sup> ETO <sup>100</sup>         | 20.24 ± 10.16 (2.0)         |
| IMR-5 <sup>r</sup> MEL <sup>1000</sup>       | 11.10 ± 1.57 (1.5)             | SHEP <sup>r</sup> VCR <sup>10</sup>          | 20.95 ± 1.45 (2.1)          |
| IMR-5 <sup>r</sup> OXALI <sup>4000</sup>     | 10.18 ± 2.69 (1.4)             | SH-SY5Y                                      | 31.8 ± 6.50                 |
| IMR-5 <sup>r</sup> TOPO <sup>20</sup>        | 4.88 ± 1.72 (0.7)              | SK-N-AS                                      | 3.55 ± 0.21                 |
| IMR-5 <sup>r</sup> VCR <sup>10</sup>         | 472.9 ± 97.4 (65.9)            | SK-N-SH                                      | 74.94 ± 19.52               |
| IMR-5 <sup>r</sup> VINB <sup>20</sup>        | 1608 ± 212 (224)               | UKF-NB-2                                     | 4.18 ± 0.27                 |
| IMR-5 <sup>r</sup> VINOR <sup>20</sup>       | 4978 ± 147 (693)               | UKF-NB-2 <sup>r</sup> CARBO <sup>2000</sup>  | 318.2 ± 42.7 (76.1)         |
| IMR-32                                       | 1.40 ± 0.35                    | UKF-NB-2 <sup>r</sup> CDDP <sup>1000</sup>   | 1.15 ± 1.21 (0.3)           |
| IMR-32 <sup>r</sup> CARBO <sup>1000</sup>    | 9.35 ± 0.97                    | UKF-NB-2 <sup>r</sup> DOCE <sup>10</sup>     | 1108 ± 179 (265)            |
| IMR-32 <sup>r</sup> DOX <sup>20</sup>        | 35.63 ± 2.23 (5.0)             | UKF-NB-2 <sup>r</sup> DOX <sup>20</sup>      | 347.0 ± 55.2 (83.0)         |
| IMR-32 <sup>r</sup> ETO <sup>100</sup>       | 1.53 ± 0.13 (0.2)              | UKF-NB-2 <sup>r</sup> OXALI <sup>600</sup>   | 3.25 ± 0.64 (0.8)           |
| IMR-32 <sup>r</sup> GEMCI <sup>20</sup>      | 2.16 ± 0.22 (0.3)              | UKF-NB-2 <sup>r</sup> VCR <sup>10</sup>      | 5940 ± 247 (1421)           |
| IMR-32 <sup>r</sup> OXALI <sup>800</sup>     | 0.60 ± 0.02 (0.1)              | UKF-NB-3                                     | 0.49 ± 0.10                 |
| IMR-32 <sup>r</sup> TOPO <sup>7.5</sup>      | 0.45 ± 0.06 (0.1)              | UKF-NB-3 <sup>r</sup> CARBO <sup>2000</sup>  | 155.4 ± 24.6 (317)          |
| IMR-32 <sup>r</sup> VINOR <sup>5</sup>       | 16.43 ± 1.08 (2.3)             | UKF-NB-3 <sup>r</sup> CDDP <sup>1000</sup>   | 5.32 ± 1.21 (10.9)          |
| LAN-6                                        | 248.1 ± 32.9                   | UKF-NB-3 <sup>r</sup> DOCE <sup>10</sup>     | 469.6 ± 113.1 (958)         |
| NB-S-124                                     | 76.66 ± 6.51                   | UKF-NB-3 <sup>r</sup> DOX <sup>20</sup>      | 15,700 ± 1,019 (32041)      |
| NGP                                          | 12.48 ± 3.01                   | UKF-NB-3 <sup>r</sup> ETO <sup>200</sup>     | 7.97 ± 0.13 (16.3)          |
| NGP <sup>r</sup> CARBO <sup>5000</sup>       | 112.3 ± 5.0 (9.0)              | UKF-NB-3 <sup>r</sup> GEMCI <sup>10</sup>    | 0.40 ± 0.01 (0.8)           |
| NGP <sup>r</sup> CDDP <sup>1000</sup>        | 13.00 ± 0.42 (1.0)             | UKF-NB-3 <sup>r</sup> Nutlin <sup>10μM</sup> | 1.18 ± 0.07 (2.4)           |
| NGP <sup>r</sup> DACARB <sup>18</sup>        | 20.59 ± 1.84 (1.6)             | UKF-NB-3 <sup>r</sup> OXALI <sup>4000</sup>  | 1.80 ± 0.78 (3.7)           |
| NGP <sup>r</sup> DOCE <sup>20</sup>          | 159.0 ± 19.5 (12.7)            | UKF-NB-3 <sup>r</sup> TOPO <sup>20</sup>     | 7.40 ± 0.71 (15.1)          |
| NGP <sup>r</sup> DOX <sup>20</sup>           | 306.9 ± 78.5 (24.6)            | UKF-NB-3 <sup>r</sup> VCR <sup>10</sup>      | 26.59 ± 6.37 (54.3)         |
| NGP <sup>r</sup> ETO <sup>400</sup>          | 59.20 ± 11.40 (4.7)            | UKF-NB-6                                     | 0.65 ± 0.09                 |
| NGP <sup>r</sup> GEMCI <sup>20</sup>         | 41.55 ± 6.13 (3.3)             | UKF-NB-6 <sup>r</sup> CARBO <sup>2000</sup>  | 16.83 ± 1.62 (25.9)         |
| NGP <sup>r</sup> MEL <sup>3000</sup>         | 26.10 ± 3.86 (2.1)             | UKF-NB-6 <sup>r</sup> CDDP <sup>2000</sup>   | 79.93 ± 7.14 (123)          |
| NGP <sup>r</sup> OXALI <sup>4000</sup>       | 6.93 ± 0.28 (0.6)              | UKF-NB-6 <sup>r</sup> DOCE <sup>10</sup>     | 14.33 ± 4.08 (22.0)         |
| NGP <sup>r</sup> VCR <sup>20</sup>           | 6986 ± 715 (560)               | UKF-NB-6 <sup>r</sup> DOX <sup>20</sup>      | 11.80 ± 1.56 (18.2)         |
| NLF                                          | 26.78 ± 4.04                   | UKF-NB-6 <sup>r</sup> ETO <sup>200</sup>     | 3.60 ± 0.01 (5.5)           |
| NLF <sup>r</sup> CARBO <sup>5000</sup>       | 340.5 ± 34.5 (12.7)            | UKF-NB-6 <sup>r</sup> GEMCI <sup>10</sup>    | 2.10 ± 0.84 (3.2)           |
| NLF <sup>r</sup> CDDP <sup>500</sup>         | 12.58 ± 5.39 (0.5)             | UKF-NB-6 <sup>r</sup> OXALI <sup>4000</sup>  | 5.34 ± 0.71 (8.2)           |
| NLF <sup>r</sup> DOCE <sup>20</sup>          | 21.6 ± 5.98 (0.8)              | UKF-NB-6 <sup>r</sup> TOPO <sup>20</sup>     | 3.47 ± 0.81 (5.3)           |
| NLF <sup>r</sup> DOX <sup>40</sup>           | 34.88 ± 4.33 (1.3)             | UKF-NB-6 <sup>r</sup> VCR <sup>10</sup>      | 49.30 ± 2.24 (75.8)         |
| NLF <sup>r</sup> ETO <sup>100</sup>          | 7.40 ± 0.54 (0.3)              | UKF-NB-6 <sup>r</sup> VINOR <sup>40</sup>    | 228.5 ± 41.5 (352)          |

<sup>1</sup> CARBO, carboplatin; CDDP, cisplatin; DACARB, dacarbazine; DOX, doxorubicin; ETO, etoposide; GEMCI, gemcitabine; IRINO, irinotecan; MEL, melphalan; Nutlin, nutlin-3; OXALI, oxaliplatin; TOPO, topotecan; VCR, vincristine; VINB, vinblastine; VINOR, vinorelbine

<sup>2</sup> fold difference IC<sub>50</sub> resistant sub-line/ IC<sub>50</sub> respective parental cell line
